# Supplementary material
Source: publisher figshare collection journal article supplement (https://tandf.figshare.com/ndownloader/files/33931052)
Supplement: Supplementary file 1 [file 33931052]

| **Supplemental Table 1- Patient Characteristics, by Inclusion Status** | | | | | |
| --- | --- | --- | --- | --- | --- |
| **Characteristics** | **Excluded** | **Included** | **Total** | **p*** |
| Number of Participants | 104 | 69 | 173 |  |
| Age, median [IQR] | 69 [58-78] | 70 [62-80] | 70 [59-79] | .3530 |
| NIHSS, median [IQR] | 5.5 [3-12] | 6 [3-12] | 6 [3-12] | .8028 |
| Male | 45 (43) | 33 (48) | 78 (45) | .5553 |
| Education |  |  |  | .0030 |
| Less than HS Graduate | 2 (2) | 3 (4) | 5 (3) |  |
| HS Graduate | 17 (16) | 7 (10) | 24 (14) |  |
| Some College | 14 (13) | 12 (17) | 26 (15) |  |
| College Graduate | 30 (29) | 24 (35) | 54 (31) |  |
| Advanced Degree | 13 (13) | 19 (28) | 32 (18) |  |
| Missing | 28 (27) | 4 (6) | 32 (18) |  |
| Insurance |  |  |  | .1421 |
| Medicaid/Medicare | 58 (56) | 46 (67) | 104 (60) |  |
| Private | 33 (32) | 20 (29) | 53 (31) |  |
| None/self-pay | 13 (13) | 3 (4) | 16 (9) |  |
| Stroke Subtype |  |  |  | .4893 |
| Cardioembolic | 24 (23) | 20 (29) | 44 (25) |  |
| Cryptogenic | 23 (22) | 8 (12) | 31 (18) |  |
| Large artery atherosclerosis | 27 (26) | 18 (26) | 45 (26) |  |
| Small artery disease | 19 (18) | 15 (22) | 34 (20) |  |
| Other | 11 (11) | 8 (12) | 19 (11) |  |
| Impaired Right Side | 33 (38) | 34 (49) | 67 (43) | .0791 |
| Acute Intervention | 37 (36) | 19 (28) | 56 (32) | .2684 |
| Smoker | 34 (33) | 21 (30) | 55 (32) | .7549 |
| Prior Stroke/TIA | 24 (23) | 18 (26) | 42 (24) | .6512 |
| Hypertension | 76 (73) | 48 (70) | 124 (72) | .6157 |
| Dyslipidemia | 49 (47) | 32 (46) | 81 (47) | .9241 |
| Cardiac Disease | 26 (25) | 17 (25) | 43 (25) | .9569 |
| Diabetes | 36 (35) | 19 (28) | 55 (32) | .3275 |
| Obesity | 1 (1) | 4 (6) | 5 (3) | .0630 |
| Discharged to Inpatient Rehabilitation | 43 (41) | 47 (68) | 90 (52) | .0006 |
| Acute Motricity Side, mean (SD) | 73.26 (35.18) | 71.55 (29.8) | 72.5 (32.82) | .7480 |
| Acute Motricity Arm, mean (SD) | 71.46 (36.95) | 67.41 (34.51) | 69.67 (35.84) | .4846 |
| Acute Motricity Leg, mean (SD) | 74.99 (35.11) | 75.84 (28.65) | 75.37 (32.31) | .8707 |
| Fugl-Meyer Upper Extremity, mean (SD) | 45.77 (22.94) | 41.91 (22.39) | 44.06 (22.71) | .2935 |
| Note: Values are reported as n (col%) unless otherwise specified. Abbreviations: TIA, transient ischemic attack; HS, high school; NIHSS, National Institute of Health Stroke Scale | | | | | |
